# Supplementary material for: Mapping the multimodal action of melamine-poly(aluminium phosphate) in the flame retardancy of polyamide 66
Source: Royal Society of Chemistry journal article supplement (doi:10.1039/c4ra02005g), 2014-01-01
Supplement: c4ra02005g1.pdf [file c4ra02005g1.pdf]

**Supplementary data**

**Mapping the multimodal action of Melamine-poly(aluminium phosphate) in the flame retardancy of polyamide 66**

Anil D. Naik,<sup>a</sup> Gaëlle Fontaine,<sup>a</sup> Fabienne Samyn,<sup>a</sup> Xavier Delva,<sup>b</sup> Jérémie Louisy,<sup>b</sup> Séverine Bellayer,<sup>a</sup> Yann Bourgeois,<sup>b</sup> and Serge Bourbigot\*<sup>a</sup>

<sup>a</sup>ISP/UMET – UMR/CNRS 8207, Ecole Nationale Supérieure de Chimie de Lille (ENSCL),  
Avenue Dimitri Mendeleïev – Bât. C7a, BP 90108, 59652 Villeneuve d'Ascq Cedex, France.

<sup>b</sup>Floridienne Chimie, 12 Quai des Usines, 7800 Ath, Belgium,

\*Corresponding author:

Phone: +33 (0)3 20 43 48 88, Fax: +33 (0)3 20 43 65 84

E-mail address: [serge.bourbigot@ensc-lille.fr](mailto:serge.bourbigot@ensc-lille.fr).

**Table S1.** Solid state NMR data for additives, formulations and their degradation products

| Additives/formulations | <sup>27</sup> Al (δ, ppm)      | <sup>31</sup> P (δ, ppm)                   | <sup>13</sup> C (δ, ppm)     |
|------------------------|--------------------------------|--------------------------------------------|------------------------------|
| S200                   | 39.2, 12.1, -17.7              | 0w, -10.3, -21.7, -24.4, -27.2, -30.8      | 164.9, 157.6                 |
| S200-395               | 38.8, 12.2w, -17.7             | 0, -12.6, -27,-31                          | 163.7, 156.3                 |
| S200-545               | 39.3, 3.4, -17.0               | -9.2br, -20, -29.4                         | 164.2, 156.0                 |
| S200-750               | 39.5, -13.0w                   | 0w, -13.7, -28.4                           | 156br, 70br, 40br            |
| AlPi+S200-323          | 37.7, -13.3, -18.8             | 42.9, 41.3, 40.8sh, -27.2, -30.7           | 8.3, 18-24m                  |
| AlPi+S200-430          | 38.2, 5.7w, -14.5              | 1.3w, -11.3, -27.3                         | 20.6br, 7.3, 169.1w, 159.2 w |
| AlPi+S200-581          | 37.8s, 6.3w, -15.8w            | -28.8br, 0w                                | Not visible                  |
| AlPi                   | -13.3                          | 41.2, 42.9                                 | 8.3m, 20.2m                  |
| AlPi-452               | 38.3, -13.1, 7.2w              | 40.3, 43.0, 11.2, -26.7br                  | 8.6m, 20.3br                 |
| PA66/GF+S200           | 54.1sh, 39.8, -17.9            | -21.7, -24.3w, -10br -27.3, -30.9          | 173.2, 25.1m,42.3m           |
| PA66/GF+S200-100       | 49.6, 38.7, -18.0              | -27.2, -30.8, -36.2w                       | 173.2, 25.2m,42.4m           |
| PA66/GF+S200-300       | 51.3, 39.3, 5.7, -17.9         | -27.2, -31, -36.4br                        | 173, 127br, 29.7m, 39.2m     |
| PA66/GF+S200-382       | 48.3, 38.1, -17.7              | -27.1, -30.7                               | 129.2br, 29.1m               |
| PA66/GF+S200-460       | 50.4, 39.8, 4.6, -19.6         | 0, -33.2                                   | 128.3br, 27.9m               |
| PA66/GF+S200-600       | 54.7, 48.0, -18.1, 9.1w        | 0w, -35.0br                                | 127.2br, 28.8m               |
| PA66/GF+AlPi           | 50.3, -12.2                    | 42.8, 41.2                                 | 173.2, 7.6, 19.8m, 42.4m     |
| PA66/GF+AlPi-600       | 52.5, 38.7, 14.1, -11.9        | 40.3, 42.8, 11.6, -11.7, -30.5             | 126w, 5.7, 20.3w             |
| PA66/GF+AlPi+S200      | 53.7sh, 39.4, -12.2, -17.5     | 42.8, 41.1, -20.9w, -23.9w, -26.6w, -30.2w | 173.6, 20.4-42.3m, 20.7, 7.6 |
| PA66/GF+AlPi+S200-100  | 51.4, 38.9, 13.4, -12.2, -17.2 | 42.7, 40.5, -11w, -30.5                    | 173.2, 25.1-43.1m, 19.7, 7.6 |
| PA66/GF+AlPi+S200-300  | 53.7sh, 38.9, -11.9, -18.5w    | 42.8, 40.3, -30.7                          | 173.4, 25.1-42.2m, 7.2, 14.3 |
| PA66/GF+AlPi+S200-430  | 52.2sh, 39.2, -12.2, -16.7     | 42.7, 40.3                                 | 135br, 29.2, 14.0, 7.5       |
| PA66/GF+AlPi+S200-600  | 51.5, 38.8, 13.8, -11.3w       | -11.7w, -30.2                              | 129br, 20br                  |
| PA66/GF+AlPi+S200-1000 | 51.6sh, 38.6                   | -30.7                                      | 129.3, 15br                  |

w=weak; br= broad; sh= shoulder; m= multiplet

**Table S2.** X-ray powder diffraction data and FTIR spectral data (at RT) on selected compounds

| Sample                 | Major Diffraction peaks<br>2 $\theta$ , (°)                                                    | Major bands in FTIR<br>(cm <sup>-1</sup> )                                                            |
|------------------------|------------------------------------------------------------------------------------------------|-------------------------------------------------------------------------------------------------------|
| S200                   | 11.1, 12.7, 15.0, 15.4, 16.6, 18.3,<br>20.5, 21.5, 22.4, 22.8, 26.8, 28.2,<br>30.5, 34.9, 35.6 | 3395m, 3359m, 3157m, 3077m,<br>1673s, 1512m, 1409m, 1270m,<br>1128s, 1063s, 947m, 884s, 780m,<br>471s |
| S200-395               | 15.4, 20.5, 21.6, 22.8, 26.6, 30.5,<br>35.6                                                    | 3440w, 3178m, 3043m, 1646s,<br>1558s, 1373s, 1233s, 1125vs,<br>946m, 786w, 718w, 463s                 |
| S200-545               | 20.4, 21.5, 35.5                                                                               | 3445w, 3217w, 1646m, 1472m,<br>1124vs, 938s, 814w, 719w, 468s                                         |
| S200-750               | 20.7, 21.8, 35.8                                                                               | 1118vs, 943m, 726w, 464s                                                                              |
| PA66/GF+S200-1000      | 20.7, 21.5, 35.4w                                                                              | 1115s, 918m, 720w, 441s                                                                               |
| PA66/GF+AlPi+S200-1000 | 20.4, 21.5, 35.6w                                                                              | 1124s, 938m, 709w, 458s                                                                               |

s=strong, w=weak, m=medium intensity
